1 Knowledge and experiences of adolescent girls and young women in the use of  
2 sexual reproductive health and HIV services at health facilities in Maputo City,  
3 Mozambique

4

5

6

7 **Authors:**

8 Vasco A. Muchanga<sup>1</sup>; Luisa Huo<sup>1</sup>, Kathryn T. Kampa<sup>2</sup>, Baltazar Chilundo<sup>1</sup>; Khátia R.

9 Munguambe<sup>1</sup>, Troy D. Moon<sup>2</sup>

10

11

12 **Institutions:**

13 1 Department of Community Health, Faculty of Medicine, Eduardo Mondlane University, Maputo  
14 City, Mozambique;

15 2 Department of Tropical Medicine and Infectious Diseases, School of Public Health and  
16 Tropical Medicine, Tulane University, New Orleans, The United States of America

17

18

19

20 **Corresponding author:**

21 [vascomuchanga@yahoo.com.br](mailto:vascomuchanga@yahoo.com.br) (VM)

22 ORCID ID: <https://orcid.org/0000-0002-1323-6106>

23

24

25

26

27

28

## 29 **Abstract**

30 **Background:** Knowledge and use of sexual reproductive health and human immunodeficiency  
31 virus (SRH and HIV) services are crucial for the prevention of pregnancy and sexually transmitted  
32 infections (STIs) among adolescent girls and young women (AGYW). This study aims to assess  
33 the knowledge and perceptions of AGYW about the SRH and HIV services offered in health  
34 facilities in Maputo, Mozambique.

35 **Material and methods:** A cross-sectional descriptive study was conducted based on exit surveys  
36 with AGYW held at Zimpeto and 1° de Junho Health Facilities in Maputo City, between May 1,  
37 and June 9, 2023. Data were analyzed through descriptive statistics, t-test and ANOVA, using  
38 SPSS version 20.

39 **Results:** 590 AGYW, aged 15-24 years of age, were included in the study. In general, knowledge  
40 of SRH and HIV services was fairly high, with knowledge of each specific service offered ranging  
41 between 38% and 97%. Knowledge about SRH and HIV services differed depending on the health  
42 facility where the AGYW sought SRH and HIV services; the participant's age; their occupation;  
43 their religion, and who they lived with. Counseling services were the most commonly reported  
44 services attended, with >90% of participants reporting having received counseling for each of the  
45 following: STI and HIV and pregnancy prevention, sexuality, and safer sex practices. The quality  
46 of SRH and HIV services, and attitudes of the providers were considered good by >90% of AGYW.  
47 Roughly 95% of AGYW at Zimpeto Health Facility were either “satisfied” or “very satisfied”.  
48 Whereas at 1° de Junho Health Facility, only roughly 75% of AGYW were either “satisfied” or  
49 “very satisfied”, and roughly 20% of AGYW were “little satisfied that their needs had been met  
50 that day.

51 **Conclusions:** Among AGYW there is high levels of knowledge about counseling services in  
52 contrast to diagnostics, treatment and clinical care. Specific attention should be given to ensuring  
53 appropriate physical infrastructure, such as dedicated adolescent friendly spaces and comfortable  
54 seating, and targeted interventions designed and implemented for those health facilities's  
55 identified. Targeted interventions should be designed and implemented for those HF's identified  
56 with lower AGYW perceived quality of service delivery.

57 **Keywords:** Adolescent; Adolescent Girls and Young Women; Sexual Reproductive Health; HIV;  
58 Mozambique

59

## 60 **Introduction**

61 Adolescent girls and young women (AGYW) remain at the highest risk of acquiring human  
62 immunodeficiency virus (HIV) in sub-Saharan Africa (1). Globally in 2023, it was estimated that  
63 an average of 4,000 AGYW aged 15–24 years became newly infected with HIV each week, of  
64 which roughly 75% occurred in sub-Saharan Africa. AGYW are three times as likely to acquire  
65 HIV than their male counterparts (2).

66 Evidence shows that in sub-Saharan Africa, adolescents engage in sexual activity at a very young  
67 age (average age of 13 years), yet most do not use any form of protection against unintended  
68 pregnancies and STIs (3). In a multi-country analysis, the prevalence of first pregnancy among  
69 AGYW ranged from 7.2% (Rwanda) to 44.3% (in Congo) (4). General knowledge about sexually  
70 transmitted infections (STI) and HIV, as well as about sexual reproductive health (SRH) services  
71 has been shown to be limited among AGYW (5). Further, AGYW face a number of challenges in  
72 terms of access to comprehensive health care, meeting their contraceptive needs, and the ability to  
73 negotiate safe sex (6).

74 Despite various efforts by the Mozambican Ministry of Health (MoH) to promote interventions  
75 that prevent HIV infections, STI, and early pregnancy through adolescent and youth-friendly  
76 health services (AYFHS), Mozambique has the highest reported proportion of AGYW who have  
77 had sex before the age of 15 in sub-Saharan Africa. Furthermore, as of 2017, Mozambique ranks  
78 third in terms of countries with the highest birth rate among adolescents (123 per 1000 women)  
79 (7). In 2023, 61% of females in Mozambique reported having had a live birth by the age of 19  
80 years. Mozambique is also a country with a high HIV disease burden. In 2023, the HIV prevalence  
81 ranged from 8 to 21% across Mozambique's 11 provinces. In the same year, Maputo, the country's

82 capital city, reported an HIV prevalence of 16%. Nationwide, HIV prevalence among persons aged  
83 15-24 stands at 5.4%. Within this age group, women have a higher HIV prevalence (8%) as  
84 compared to men (2.6%). While 54% of AGYW have been reported as having tested for HIV, only  
85 1.4% received their results, which could give rise to gaps in the provision of HIV services (8).

86 An analysis of the gaps and obstacles in priority interventions for the prevention and treatment of  
87 HIV/AIDS in adolescents in Mozambique, carried out in 2017, found that <40% of adolescents  
88 reported having accessed AYPHS, yet only 13.6% reported actively using a modern contraceptive  
89 method (9). The most recent Demographic Health Survey (2023) carried out in Mozambique,  
90 indicates that the prevalence of modern contraceptive use was approximately 16% among AGYW  
91 (10).

92 Studies on the barriers to accessing SRH and HIV services across sub-Saharan Africa, commonly  
93 report inadequate information on the part of the AGYW about the availability of services, as well  
94 as their misperceptions about SRH and HIV services. In addition, services offered in an  
95 unsupportive environment and poor provider attitudes have been listed as potential barriers to  
96 accessing care (11,12).

97 To contribute to addressing gaps in the understanding of AGYW utilization of SRH and HIV  
98 services in Mozambique, this study aims to first, assess AGYW knowledge about SRH and HIV  
99 services availability, and second, to explore AGYW experiences with utilizing SRH and HIV  
100 services at two health facilities (HF) in Maputo City, Mozambique.

## 101 **Materials and methods**

## 102 **Study design**

103 We conducted a cross-sectional descriptive study that utilized a mixed-method approach to assess  
104 AGYW knowledge about, and experiences with, accessing SRH and HIV services in Mozambique.  
105 This analysis represents baseline (phase one) data collection of a larger multi-phase  
106 implementation science study aiming to assess the feasibility and effectiveness of an “adolescent-  
107 friendly approach” for improving access to and use of SRH and HIV services by AGYW at selected  
108 HF. At baseline, we conducted an exit survey with AGYW who had sought SRH and HIV services  
109 at the Zimpeto and 1° de Junho HFs in Maputo City, Mozambique. The selection of these health  
110 facilities was based on their prior poor performance indicators related to AGYW’s access to and  
111 use of the SRH and HIV services.

## 112 **Study population**

113 All AGYW, aged 15-24 years, who had accessed SRH and HIV services at either of the two study  
114 facilities between May 1 and June 9, 2023, were considered eligible to participate in the exit  
115 survey. AGYW were selected by convenience and approached for enrollment as they were exiting  
116 the HF, provided they had any contact with the SRH or HIV services on the day of the interview.  
117 Initially, a sample size of 520 AGYW was defined, but during the data collection process, 598  
118 were consented and enrolled.

## 119 **Data collection and management**

120 Interviews took place on weekdays, during the normal service hours of the two HF (7:30 a.m. to  
121 3:30 p.m.). The first AGYW to leave the HF during this time interval was approached and, if  
122 accepted, she was interviewed. Only after the interview was finished would other participants be

123 approached for recruitment, and so on until the defined sample was reached. Trained interviewers,  
124 fluent in Portuguese and the principal local language, Changana, conducted the interviews using a  
125 semi-structured interview guide in a private location.

126 AGYW were questioned about their sociodemographic data; knowledge of the types of SRH and  
127 HIV services offered at the HF for AGYW; types of SRH and HIV services received on the day  
128 of the visit; the perceived quality of the SRH and HIV services offered on the day of the visit; and  
129 their level of satisfaction with the SRH and HIV services received on the day of the visit. Questions  
130 designed to assess AGYW knowledge about the services offered and received, were based off a  
131 list of SRH and HIV services outlined in the *Guidelines for the Implementation of adolescent and*  
132 *youth-friendly health services of the Mozambican Ministry of Health* (13). Questions related to the  
133 perceived quality of the services offered were based on World Health Organization (WHO)  
134 standard quality assessment questions for AYFHS (14).

135 A survey tool was developed using REDCap (Research Electronic Data Capture) and administered  
136 via a tablet in an offline system (REDCap v10.6.12, 2023). At the end of each day, data was  
137 synchronized and sent to a REDCap server housed at the Faculty of Medicine of University  
138 Eduardo Mondlane (UEM) in Maputo. The data were extracted from REDCap into excel format,  
139 and then imported into the Statistical Package for the Social Sciences (SPSS) Version 2.0. Data  
140 were cleaned and all lines with missing data for reference variables for analysis were excluded  
141 from the analysis.

## 142 **Data analysis**

143 Descriptive statistics using absolute and relative frequencies were applied to identify which SRH  
144 and HIV services were known to AGYW; which SRH and HIV services were used, including  
145 modern contraceptive methods; and to assess AGYW perceptions of the environment of the health  
146 facility to serve adolescents. T-test and ANOVA were applied to identify the sociodemographic  
147 factors associated with average knowledge, considering a significance level of 5%. To assess the  
148 average knowledge of participants, each of the 10 questions relating to each type of SRH and HIV  
149 service was assigned a score of 10 percent. Afterwards, the knowledge level variable was created,  
150 which adds up the score for the number of services known by each participant, ranging from 0 to  
151 100%. The average knowledge was calculated from the knowledge level variable. The average  
152 knowledge was compared between the AGYW in the two study sites and their sociodemographic  
153 characteristics to identify the factors associated with the level of average knowledge.

## 154 **Ethical considerations**

155 The study protocol was reviewed and approved by the Mozambican National Bioethics Committee  
156 for Health (Ref: 88/CNBS/23). Administrative approval was granted by the MoH of Mozambique  
157 (Note nr: 396/GMS/290/023). All participants provided written informed consent prior to  
158 participation in the exit interview. For participants below the age of 18 years, informed consent  
159 was first obtained from a parent/guardian and then informed assent from the participant. No  
160 identifying information was recorded by the interviewer to ensure anonymity.

## 161 **Results**



## 162 Participant characteristics

163 A total of 598 AGYW were approached and surveyed. Eight participants were subsequently  
164 excluded from the analysis because of missing data. A total of 590 AGYW were included in this  
165 analysis, of which 304 (51.5%) were recruited from the 1° de Junho HF and 286 (48.5%) from the  
166 Zimpeto HF. Age of the AGYW's was nearly evenly split between those aged 15-19 years (51%)  
167 and those 20-24 years (49%), with a mean age of 20 years  $\pm$ 2.42 for all participants. Approximately  
168 70% (n=419) of respondents listed themselves as a current student, of which the majority (86.8%)  
169 had achieved a level of secondary education. Of the AGYW interviewed, 79.6% (n=468) were  
170 single, while 20.4% (n=122) were married or in a non-civil marriage. Christianity was the leading  
171 religion, being the majority classified as Christian-Other (which included protestant and  
172 evangelical). The majority of participants (65.5%) lived with their parents, while 19.3% (n=114)  
173 lived with their husbands (see Table 1).

174 **Table 1: Participant Sociodemographic Characteristics**

| Characteristic (n=590) | n (%)         |
|------------------------|---------------|
| Health facility        |               |
| 1° de Junho HF         | 304 (51.5)    |
| Zimpeto HF             | 286 (48.5)    |
| Age                    |               |
| 15-19 years            | 301 (51.0)    |
| 20-24 years            | 289 (49.0)    |
| Mean age               | 20 $\pm$ 2.42 |
| Level of education     |               |
| No education           | 27 (4.6)      |
| Primary                | 31 (5.3)      |
| Secondary              | 513 (86.8)    |
| Higher                 | 19 (3.2)      |
| Current student        |               |
| Yes                    | 414 (70.2)    |
| Marital status         |               |
| Married/Marital Union  | 122 (20.4)    |
| Single                 | 468 (79.6)    |
| Religion               |               |
| Christian - Catholic   | 203 (34.4)    |
| Christian - other      | 316 (53.5)    |
| Muslim                 | 29 (4.9)      |

|     |                         |            |
|-----|-------------------------|------------|
| 175 | No religion or other    | 42 (7.1)   |
| 176 | Who you live with?      |            |
| 176 | Alone                   | 6 (1.0)    |
| 177 | Mother/Father/Parents   | 386 (65.4) |
| 177 | Siblings                | 19 (3.2)   |
| 178 | Grandfather/Grandmother | 30 (5.1)   |
| 178 | Uncles                  | 35 (5.9)   |
| 179 | Husband                 | 114 (19.3) |

180

## 181 **AGYW knowledge of sexual reproductive health and HIV services** 182 **available at health facility**

183 In general, AGYW knowledge of SRH and HIV services was fairly high, with knowledge of each  
184 specific service offered ranging between 38% and 97%. The best-known SRH and HIV services  
185 were pregnancy prevention counseling (97%); HIV and STI prevention counseling (97%); safe sex  
186 counseling (97%); sexuality counseling (96%); HIV and STI diagnostic testing (89%); antenatal  
187 care consultations (84%); and gender-based violence (GBV) services (82%). Pregnancy testing  
188 services (64%), and abortion services (72%) were moderately known, and the least known service  
189 was the postpartum care clinics (38%) (see Fig 1).

190 Average knowledge about SRH and HIV services differed depending on where the AGYW sought  
191 healthcare, the participants age, their status of status of employment, their religion, and who they  
192 lived with. AGYW who attend the Zimpeto HF had a higher average level of knowledge about the  
193 SRH and HIV services offered (86.6%; CI: 83.8-89.3) compared to those who attended the 1° de  
194 Junho HF (76.3%; CI:74.3-78.3) ( $p<0.001$ ). AGYW aged 20-24 years had a higher average level  
195 of knowledge (83%; CI: 80.7-85.4), when compared to AGYW aged 15-19 years (79.6%; CI: 77.1-  
196 82.1) ( $p=0.046$ ). AGYW who are actively in school had a higher average level of knowledge about  
197 SRH and HIV services (82.4%; CI: 80.2-84.5), compared to adolescents who are out of school  
198 (78.7%; CI: 75.8-81.7) ( $p=0.048$ ). AGYW who report a religious affiliation: Protestant (77.9%;

199 CI: 75.5-80.3), Catholic (86.5%; CI:83.8-89.3), and Muslim (88.9%; CI: 83.2-94.7), had a higher  
 200 average level of knowledge when compared to those reporting no religious affiliation (75.8%; CI:  
 201 67.9-83.8) ( $p<0.001$ ). Of note, a significantly higher average level of knowledge was observed  
 202 among Muslim and Catholic participants, compared to Protestants or non-religious counterparts.  
 203 Lastly, AGYW who live with their parents had a higher average level of knowledge (84.20% CI:  
 204 82.2-86.2) when compared to other groups (living alone, with siblings, grandmother/grandfather,  
 205 uncles or with spouses, respectively), (78.3% CI: 66.1 – 90.6; 81.6% CI: 74.2 – 89.0; 69.3% CI:  
 206 57.8 – 80.9; 69.7% CI: 60.9 – 78.5 and 78.3% CI: 74.5 – 81.9) ( $p<0.001$ ). All associations observed  
 207 were statistically significant. The characteristics not showing a statistically significant association  
 208 with knowledge about SRH and HIV services were marital status and level of education (see Table  
 209 2).

210 **Table 2: Factors associated with knowledge about SRH and HIV services offered**

| Characteristics                | n   | Mean | 95% CI      | <i>p-value</i> |
|--------------------------------|-----|------|-------------|----------------|
| Site                           |     |      |             | <0.001*        |
| 1° de Junho HF                 | 304 | 73.3 | 74.3 – 78.3 |                |
| Zimpeto HF                     | 286 | 86.6 | 83.8 – 89.3 |                |
| Age                            |     |      |             | 0.046*         |
| 15-19 years                    | 301 | 79.6 | 77.1 – 82.1 |                |
| 20-24 years                    | 289 | 83.1 | 80.7 – 85.6 |                |
| Level of education             |     |      |             | 0.089          |
| No schooling                   | 27  | 83.7 | 72.7 - 94.7 |                |
| Primary                        | 31  | 72.9 | 63.9 - 81.9 |                |
| Secondary                      | 513 | 81.9 | 80.0 - 83.7 |                |
| Higher                         | 19  | 76.3 | 70.5 - 82.2 |                |
| Employment Status <sup>#</sup> |     |      |             | 0.048*         |
| Student                        | 414 | 82.4 | 80.3 - 84.5 |                |
| Unemployed/Out of School       | 176 | 78.7 | 75.7 – 81.7 |                |
| Marital status                 |     |      |             | 0.118          |
| Single                         | 468 | 81.8 | 79.9 - 83.8 |                |
| Married/marital union          | 117 | 78.4 | 74.8 – 82.0 |                |
| Religion                       |     |      |             | <0.001*        |
| No religion                    | 41  | 75.9 | 67.9 – 83.8 |                |
| Protestant                     | 316 | 77.9 | 75.6 – 80.3 |                |
| Catholic                       | 203 | 86.6 | 83.8 – 89.3 |                |
| Muslim                         | 29  | 89.0 | 83.2 – 94.8 |                |
| Who do you live with?          |     |      |             | <0.001*        |
| Alone                          | 6   | 78.3 | 66.1 – 90.6 |                |

|                         |     |      |             |  |
|-------------------------|-----|------|-------------|--|
| Mother/Father           | 386 | 84.2 | 82.2 – 86.2 |  |
| Siblings                | 19  | 81.6 | 74.2 – 89.0 |  |
| Grandmother/Grandfather | 30  | 69.3 | 57.8 – 80.9 |  |
| Uncles                  | 35  | 69.7 | 60.9 – 78.5 |  |
| Spouse                  | 114 | 78.3 | 74.5 – 81.9 |  |

211 # Question response options were Employed, Unemployed, and Student. No one answered Employed

212

## 213 **Types of SRH and HIV services received by AGYW on the day of** 214 **the health facility visit**

215 AGYW reported a variety of SRH and HIV services they sought on the day of their interview.  
216 Counseling services were the most commonly reported services, with >90% of participants  
217 reporting having received counseling for each of the following: STI and HIV prevention,  
218 pregnancy prevention, sexuality, and safer sex practices. Further, 51% of participants attended  
219 Family Planning services and 31% received testing for HIV and/or another STI. Smaller numbers  
220 of participants attended other services such as antenatal care or gender-based violence (GBV)  
221 counseling (<20% for each service). Among those participants who attended Family Planning  
222 services on the day of visit to the HF (n=303), birth control options were received in the following  
223 proportions: 33% injectables (Depo-Provera); 30% oral contraceptive pill; 16% male condoms;  
224 12% female condoms; and 10% implant. Participants could receive more than one type of  
225 contraceptive (see Fig 2).

226

## 227 **AGYW perceptions of the quality of SRH and HIV services offered** 228 **at their health facility**

229 AGYW perceptions based on their experiences accessing SRH and HIV services were captured  
230 through a series of questions to explore their perceptions of the quality of care received, including

231 their opinion about the physical environment in which the services were offered. Overall, more  
232 than 90% of participants reported to have received counseling in private spaces and that upon  
233 arrival to the service, they were greeted and served according to their needs. At Zimpeto HF, over  
234 95% of participants reported that services were offered in a dedicated space catering to adolescents.  
235 In contrast, roughly 15% of participants at 1° de Junho HF reported a lack of an adolescent  
236 dedicated space. In addition, the vast majority of participants (92.6%) at 1° de Junho HF reported  
237 a lack of separate waiting room for adolescents, compared to Zimpeto HF, where <10% of  
238 participants reported a lack a separate waiting room. At both facilities, >90% of participants  
239 reported that the HF did not have a dedicated schedule for when adolescent services were available  
240 and >25% of AGYW reported no comfortable sitting arrangements at the waiting area.

241 In terms of service quality, >90% of participants at both facilities ranked the attitude of the provider  
242 as “Good”. At Zimpeto HF >90% of participants ranked the quality of services provided as  
243 “Good”, whereas at 1° de Junho HF, only 79% ranked the services as “Good” and 18% ranked  
244 them only as acceptable.

245 When asked about how satisfied the participant was with regards to if their needs had been met  
246 that day, roughly 95% of AGYW at Zimpeto HF responded they were either “satisfied” or “very  
247 satisfied”. Whereas at 1° de Junho HF, roughly 75% of AGYW reported they were either  
248 “satisfied” or “very satisfied”, and approximately 20% responded they were “little satisfied” (see  
249 Table 3).

250 **Table 3: AGYWs’ experiences and perceptions about SRH and HIV services offered**

| How do you evaluate the environment of the health facility’s services to adolescents? | 1° de Junho<br>n (%) | Zimpeto<br>n (%) | Total<br>n (%) |
|---------------------------------------------------------------------------------------|----------------------|------------------|----------------|
| Is there a counseling area for adolescents that provides privacy?                     |                      |                  |                |
| No                                                                                    | 23 (7.6)             | 6 (2.1)          | 29 (4.9)       |

|                                                                                             |            |            |            |
|---------------------------------------------------------------------------------------------|------------|------------|------------|
| Yes                                                                                         | 281 (92.4) | 280 (97.9) | 561 (95.1) |
| Are adolescents greeted and served according to their needs or those of their partner(s)?   |            |            |            |
| No                                                                                          | 27 (8.9)   | 8 (2.8)    | 35 (5.9)   |
| Yes                                                                                         | 277 (91.1) | 278 (97.2) | 555 (94.1) |
| Does the health facility have a separate space to offer services to adolescents?            |            |            |            |
| No                                                                                          | 48 (15.8)  | 14 (4.9)   | 62 (11.0)  |
| Yes                                                                                         | 256 (84.2) | 272 (95.1) | 528 (89.0) |
| Does the health facility have a comfortable place for adolescents to sit?                   |            |            |            |
| No                                                                                          | 109 (35.9) | 70 (24.5)  | 178 (30.3) |
| Yes                                                                                         | 195 (64.1) | 216 (75.5) | 411 (69.7) |
| Does the health facility have a separate waiting room for adolescents?                      |            |            |            |
| No                                                                                          | 276 (92.6) | 22 (7.4)   | 298 (51.0) |
| Yes                                                                                         | 28 (9.6)   | 264 (90.4) | 292 (49.0) |
| Is there a specific schedule for adolescents in this health facility?                       |            |            |            |
| No                                                                                          | 281 (92.5) | 285 (99.7) | 566 (95.9) |
| Yes                                                                                         | 23 (7.5)   | 1(0.03)    | 24 (4.1)   |
| How do you evaluate the attitude of the provider who assisted you?                          |            |            |            |
| Bad                                                                                         | 10 (3.3)   | 0 (0.0)    | 10 (1.7)   |
| Acceptable                                                                                  | 40 (13.2)  | 9 (3.1)    | 49 (8.3)   |
| Good                                                                                        | 254 (83.6) | 277 (96.9) | 531 (90.0) |
| Overall, how do you evaluate the provision of SRH and HIV services in this health facility? |            |            |            |
| Bad                                                                                         | 9 (3.0)    | 3 (1.0)    | 12 (2.0)   |
| Acceptable                                                                                  | 55 (18.1)  | 25 (8.7)   | 80 (13.6)  |
| Good                                                                                        | 240 (79.0) | 258 (90.2) | 498 (84.4) |
| How satisfied were you that your needs were met today?                                      |            |            |            |
| Little satisfied                                                                            | 62 (20.4)  | 12 (4.2)   | 74 (12.5)  |
| Not satisfied                                                                               | 17 (5.6)   | 3 (1.2)    | 20 (3.4)   |
| Satisfied                                                                                   | 193 (63.5) | 258 (90.0) | 451 (76.4) |
| Very satisfied                                                                              | 32 (10.5)  | 13 (4.6)   | 42 (7.7)   |

251 Note: The NO option includes those who answered that they don't know

252

## 253 Discussion

254 This study aimed to assess the knowledge of AGYW seeking health services in selected HF in

255 Maputo, Mozambique related to the SRH and HIV services being offered, as well as to explore

256 their experiences in utilizing these services. This type of assessment is relevant and addresses the  
257 WHO recommendation to ensure that adolescents are aware of what health services are being  
258 provided, and where, when, and how to obtain them (14).

259 This study represents a baseline assessment of a larger implementation science study to evaluate  
260 the feasibility and effectiveness of an “adolescent-friendly approach” for improving access to and  
261 use of SRH and HIV services by AGYW.

262 Broadly speaking, knowledge about SRH and HIV services in our population of Mozambican  
263 AGYW was high. Specifically, the best-known services were counseling services at the HFs  
264 related to safe sexual practices including pregnancy prevention, HIV/STI prevention, and  
265 understanding one’s sexuality. Awareness of testing services for pregnancy and HIV/STI was  
266 slightly less, and the least known services were those related to antenatal and post-partum care.  
267 When we compare our AGYW population to other similar populations across sub-Saharan Africa,  
268 our findings show that generalized knowledge about SRH and HIV services in Mozambican  
269 AGYW is higher (15–18). However, when we begin looking at the different types of services  
270 individually, we found that knowledge of HIV and STI testing was generally higher in  
271 Mozambique as well as in other countries such as Ghana, Ethiopia, and Nigeria. The high level of  
272 knowledge observed in the group involved in our study, compared to the groups involved in other  
273 studies carried out in Ghana, Ethiopia, and Nigeria, may be linked to the fact that our study was  
274 based in the HF and the group involved had just had contact with SRH and HIV services. Whereas  
275 the studies carried out in other contexts were based at community level, possibly with a memory  
276 bias, which can limit the level of knowledge of SRH and HIV services. Furthermore, relatively  
277 low Mozambican AGYW knowledge about GBV services offered is consistent with a similar low  
278 knowledge seen in these other countries (15,19,20).

279 We found a significant association between knowledge and increased age, being a student,  
280 religion, the HF where services were sought, and whom one lives with. These findings are not  
281 surprising. First, with increased age, AGYW gain the autonomy to decide about their health and  
282 likely have had more opportunities to visit a HF and more life experiences that would enhance  
283 their overall knowledge about these services. Second, AGYW students are more likely to have  
284 more knowledge compared to those who don't, since school is one of the major sources of health  
285 information (19–22). There is controversial evidence about the association between religious  
286 affiliation and the level of knowledge about sexual and reproductive health services and HIV.  
287 While other studies suggest that religious affiliation is a protective factor against the risk of HIV  
288 (23), there is recognition that religion may offer inadequate information related to SRH and HIV  
289 (24), and at times has a negative influence on the level of knowledge about SRH among  
290 adolescents (25). Our results show a significant difference in the level of knowledge of SRH and  
291 HIV between AGYW who attend the Zimpeto HF and those who attend the 1° de Junho HF, which  
292 suggests the need to delve deeper into the internal factors of each center to better explain these  
293 differences. Furthermore, associations between the level of knowledge of SRH and HIV and the  
294 health center where AGYW seek services, may be linked to the fact that this study was carried out  
295 at the HF and involved only AGYW who visited the HF and had just had contact with SRH and  
296 HIV Services.

297 Exposure to information about SRH services has been reported as one of the predictors of SRH  
298 utilization (15,19,26). However, in this study, this seemed to be the opposite. Among the AGYW  
299 who visited health centers and had access to SRH counseling services, few of them had access to  
300 STI, HIV and early pregnancy prevention supplies. Similar results related to low use of HIV testing



301 services; STI treatment; family planning among AGYW was found in another studies conducted  
302 in similar context (7,15,20,21,27,28).

303 Study participants were generally favorable about the quality of the SRH and HIV services they  
304 had accessed in terms of existence of separate and visible areas for AGYW, and the attitude of the  
305 providers they had seen. Similar results on quality of the SRH and provider attitude were found in  
306 a study evaluating the quality of AYPHS carried out in Mozambique, Ethiopia and Nigeria (29–  
307 31), but different from the results of studies carried out in Mexico (32) and Nigeria (33), who  
308 reported negative provider attitudes characterized by judgment of AGYW when they seek SRH  
309 and HIV services. However, our results suggest that the conditions of the waiting rooms at the HFs  
310 was not comfortable. Further, there was evidence of the lack of a specific schedule for when  
311 adolescent services are offered. Nevertheless, the guide to implementing a standards approach to  
312 improving the quality of health services for adolescents, recommends that adequate seating should  
313 be made available in the waiting room for the normal flow of patients. It also recommends that  
314 HFs should have convenient hours of operation that facilitates adolescents access to these health  
315 services (14).

316 Despite these complaints, the high level of reported satisfaction among the participants seems to  
317 indicate that the quality of the service provided for AGYW is perceived as good. A similar high  
318 level of satisfaction was found in assessments of AYPHS from both Eastern and Southern Africa  
319 Regions (7,29,34,35).

## 320 **Conclusion**

321 Knowledge about SRH and HIV services offered in HFs is inconsistent across the different types  
322 of services, with high levels of knowledge about counseling in contrast to diagnostics, treatment

323 and clinical care. The results of this study suggest the need to balance the dissemination of the  
324 different SRH and HIV services targeting AGYW in the catchment areas involved in the study.  
325 Additionally, site specific attention should be given to ensuring appropriate physical infrastructure  
326 exists that takes into account the unique needs of AGYW, such as dedicated adolescent friendly  
327 spaces and comfortable seating. Finally, targeted interventions should be designed and  
328 implemented for those HF's identified with lower AGYW perceived quality of service delivery,  
329 such as we are proposing for the 1° de Junho HF.

### 330 **Competing interests**

331 The authors declare that they have no known competing financial interests or personal  
332 relationships that could have appeared to influence the work reported in this paper.

### 333 **Author's contributions**

334 VM designed the study, guided by KM, BC and TDM. VM collected the data. VM, LH, and KTK  
335 analyzed the data. VM drafted the manuscript. All authors contributed to interpretation of results  
336 and revising the manuscript.

### 337 **Acknowledgements**

338 The authors would like to thank the Department of Community Health, Faculty of Medicine,  
339 Eduardo Mondlane University; Department of Tropical Medicine and Infectious Diseases, School  
340 of Public Health and Tropical Medicine, Tulane University. The Health Managers of 1° de Junho  
341 and Zimpeto Health Facilities and the leadership of Adolescents and Youth Friendly Service at  
342 both health facilities.

### 343 **Funding**

344 Research reported in this publication was supported by the Fogarty International Center of the  
345 United States National Institutes of Health under Award Number D43TW009745. The content is  
346 solely the responsibility of the authors and does not necessarily represent the official views of the  
347 United States National Institutes of Health.

348

349

## 350 **Bibliography**

- 351 1. Murewanhema G, Musuka G, Moyo P, Moyo E, Dzinamarira T. HIV and adolescent girls  
352 and young women in sub-Saharan Africa: A call for expedited action to reduce new  
353 infections. *IJID Reg* [Internet]. 2022;5(August):30–2. Available from:  
354 <https://doi.org/10.1016/j.ijregi.2022.08.009>
- 355 2. UNAIDS. REGIONAL PROFILE; EASTERN AND SOUTHERN AFRICA [Internet].  
356 Vol. 2024. 2024. Available from: <https://www.unaids.org/en/resources/fact-sheet>
- 357 3. James PB, Osborne A, Babawo LS, Bah AJ, Margao EK. The use of condoms and other  
358 birth control methods among sexually active school-going adolescents in nine sub-Saharan  
359 African countries. *BMC Public Health*. 2022 Dec 1;22(1).
- 360 4. Ahinkorah BO, Kang M, Perry L, Brooks F, Hayen A. Prevalence of first adolescent  
361 pregnancy and its associated factors in sub-Saharan Africa: A multi-country analysis.  
362 *PLoS One* [Internet]. 2021;16(2 February):1–16. Available from:  
363 <http://dx.doi.org/10.1371/journal.pone.0246308>
- 364 5. Finlay JE, Assefa N, Mwanyika-Sando M, Dessie Y, Harling G, Njau T, et al. Sexual and  
365 reproductive health knowledge among adolescents in eight sites across sub-Saharan  
366 Africa. *Trop Med Int Heal*. 2020 Jan 1;25(1):44–53.
- 367 6. Yah CS, Ndlovu S, Kutwayo A, Naidoo N, Mahuma T, Mullick S. The prevalence of  
368 pregnancy among adolescent girls and young women across the Southern African  
369 development community economic hub: A systematic review and meta-analysis. Vol. 10,  
370 *Health Promotion Perspectives*. Tabriz University of Medical Sciences; 2020. p. 325–37.
- 371 7. UNFPA & IPPF. Regional Report: Assessment of Adolescents and Youth-Friendly Health

- 372 Service Delivery EAST AND SOUTHERN AFRICA REGION [Internet]. Johannesburg  
373 and Nairobi; 2017. Available from:  
374 [https://healtheducationresources.unesco.org/library/documents/regional-report-](https://healtheducationresources.unesco.org/library/documents/regional-report-assessment-adolescents-and-youth-friendly-health-service-delivery)  
375 [assessment-adolescents-and-youth-friendly-health-service-delivery](https://healtheducationresources.unesco.org/library/documents/regional-report-assessment-adolescents-and-youth-friendly-health-service-delivery)
- 376 8. MISAU & INS. Inquérito Nacional Sobre o Impacto do HIV e SIDA em Moçambique  
377 [Internet]. Maputo, Moçambique; 2023. Available from: <http://ins.gov.mz>
- 378 9. CNCS, UNICEF, ONUSIDA. Análise aprofundada das lacunas e obstáculos das  
379 intervenções prioritárias de prevenção e tratamento do HIV / SIDA em adolescentes em  
380 Moçambique. Maputo, Moçambique; 2017.
- 381 10. INE. Inquérito Demográfico e de Saúde 2022-23 [Internet]. Vol. 23. 2023. Available  
382 from: <https://www.ine.gov.mz/web/guest/d/ids-2022-23-relatorio-final>
- 383 11. Sidamo NB, Kerbo AA, Gidebo KD, Wado YD. Socio-Ecological Analysis of Barriers to  
384 Access and Utilization of Adolescent Sexual and Reproductive Health Services in Sub-  
385 Saharan Africa: A Qualitative Systematic Review. *Open Access J Contracept*. 2023  
386 Jun;Volume 14:103–18.
- 387 12. Zepro NB, Ali NT, Tarr N, Medhanyie AA, Paris DH, Probst-Hensch N, et al. Sexual and  
388 reproductive health services use among adolescents in pastoralist settings, northeastern  
389 Ethiopia. *BMC Health Serv Res*. 2023 Dec 1;23(1).
- 390 13. MISAU. Linhas de Orientação para implementação de Serviços Amigos de Adolescentes  
391 e Jovens (SAAJ). Maputo, Moçambique; 2023. p. 51.
- 392 14. UNAIDS. Global standards for quality health-care services for adolescents: a guide to

- 393 implement a standards-driven approach to improve the quality of health care services for  
394 adolescents. *World Heal Organ* [Internet]. 2015;1:1–40. Available from:  
395 [http://apps.who.int/iris/bitstream/10665/183935/1/9789241549332\\_vol1\\_eng.pdf](http://apps.who.int/iris/bitstream/10665/183935/1/9789241549332_vol1_eng.pdf)
- 396 15. Akakpo E, Sah C, Kumah A, Fianu PL, Oppong DA, Kodjo MM. Quality Health Services  
397 for Adolescents: Assessing Awareness and Use of Adolescent Sexual Reproductive Health  
398 Services in Keta, Ghana. *Glob J Qual Saf Healthc*. 2024 Feb 26;
- 399 16. Ninsiima LR, Chiumia IK, Ndejjo R. Factors influencing access to and utilisation of  
400 youth-friendly sexual and reproductive health services in sub-Saharan Africa: a systematic  
401 review. *Vol. 18, Reproductive health. NLM (Medline)*; 2021. p. 135.
- 402 17. Abiodun O, Sotunsa J, Jagun O, Faturoti B, Ani F, John I, et al. Prevention of unintended  
403 pregnancies in Nigeria; the effect of socio-demographic characteristic on the knowledge  
404 and use of emergency contraceptives among female university students. *Int J Reprod*  
405 *Contraception, Obstet Gynecol*. 2015;4(3):755–64.
- 406 18. O. Ajike S. Adolescent/Youth Utilization of Reproductive Health Services: Knowledge  
407 Still a Barrier. *J Fam Med Heal Care*. 2016;2(3):17.
- 408 19. Abdurahman C, Oljira L, Hailu S, Mengesha MM. Sexual and reproductive health  
409 services utilization and associated factors among adolescents attending secondary schools.  
410 *Reprod Health*. 2022 Dec 1;19(1).
- 411 20. Belay HG, Arage G, Degu A, Getnet B, Necho W, Dagne E, et al. Youth-friendly sexual  
412 and reproductive health services utilization and its determinants in Ethiopia: A systematic  
413 review and meta-analysis. *Heliyon*. 2021 Dec 1;7(12).

- 414 21. Ugwu NH, Igwe I, Nwokeoma BN, Ajuzie HD, Iwuamadi KC, Ezike SC, et al.  
415 Adolescents' knowledge and use of sexual and reproductive health services in the Federal  
416 Capital Territory, Nigeria. *Afr J Reprod Health*. 2022;26(6):80–8.
- 417 22. Eze II, Mbachu CO, Agu IC, Akamike IC, Eigbiremolen G, Onwujekwe O. Determinants  
418 of awareness, value perception, and societal support for sexual and reproductive health  
419 services among in-school adolescents in South-eastern Nigeria. *BMC Health Serv Res*.  
420 2023;23(1):1–10.
- 421 23. Shaw SA, El-Bassel N. The Influence of Religion on Sexual HIV Risk. *AIDS Behav*.  
422 2014;18(8):1569–94.
- 423 24. Tafesse W, Chalkley M. Faith-based provision of sexual and reproductive healthcare in  
424 Malawi. *Soc Sci Med [Internet]*. 2021;282(May):113997. Available from:  
425 <https://doi.org/10.1016/j.socscimed.2021.113997>
- 426 25. Gebresilassie K, Boke M, Yenit M, Baraki A. Knowledge level and associated factors  
427 about sexual and reproductive health rights among University of Gondar students, Gondar  
428 Ethiopia. *Int J Sex Reprod Heal Care [Internet]*. 2019 Aug 30;2(1):016–20. Available  
429 from: <https://www.reprodgroup.us/articles/IJSRHC-2-106.php>
- 430 26. Agbenu I, Kyei J, Naab F. Female adolescent sexual reproductive health service  
431 utilization concerns: A qualitative enquiry in the Tema metropolis of Ghana. *PLoS One*.  
432 2024 Feb 1;19(2 February).
- 433 27. Getachew S, Abate L, Asres A, Mandefro A. Knowledge, Attitude, and Practice toward  
434 Youth-Friendly Reproductive Health Services among Mizan-Tepi University Students,  
435 South-Western Ethiopia. *Sci World J*. 2022;2022.

- 436 28. Utaka EN, Sekoni AO, Badru FA. Knowledge and utilization of sexual and reproductive  
437 health services among young males in a slum area in Nigeria: A cross-sectional study.  
438 Heliyon. 2023 Jun 1;9(6).
- 439 29. Bomfim E, Mupueleque MA, Dos Santos DMM, Abdirazak A, Bernardo R de A, Zakus  
440 D, et al. Quality assessment in primary health care: Adolescent and youth friendly service,  
441 a mozambican case study. Pan Afr Med J. 2020 Sep 1;37:1–10.
- 442 30. Tilahun T, Bekuma TT, Getachew M, Seme A. Assessment of access and utilization of  
443 adolescent and youth sexual and reproductive health services in western Ethiopia. Reprod  
444 Health. 2021 Dec 1;18(1).
- 445 31. Alamdo AG, Debelle FA, Gatheru PM, Manu A, Enos JY, Yirtaw TG. Youth-friendly  
446 health service in Ethiopia: Assessment of care friendliness and user’s satisfaction. PLoS  
447 One [Internet]. 2024;19(7 July):1–18. Available from:  
448 <http://dx.doi.org/10.1371/journal.pone.0307142>
- 449 32. Pastrana-Sámamo R, Heredia-Pi IB, Olvera-García M, Ibáñez-Cuevas M, De Castro F,  
450 Hernández AV, et al. Adolescent Friendly Services: Quality assessment with simulated  
451 users. Rev Saude Publica. 2020;54:1–11.
- 452 33. Arije O, Madan J, Hlungwani T. Quality of sexual and reproductive health services for  
453 adolescents and young people in public health facilities in Southwest Nigeria: a mystery  
454 client study. Glob Health Action. 2022;15(1).
- 455 34. Godia PM, Olenja JM, Hofman JJ, Van Den Broek N. Young people’s perception of  
456 sexual and reproductive health services in Kenya. BMC Health Serv Res. 2014 Apr  
457 15;14(1).



- 458 35. Mulugeta B, Girma M, Kejela G, Meskel FG, Andarge E, Zerihun E. Assessment of  
459 Youth-Friendly Service Quality and Associated Factors at Public Health Facilities in  
460 Southern Ethiopia: A Facility-Based Cross-Sectional Study. Biomed Res Int. 2019;2019.

461

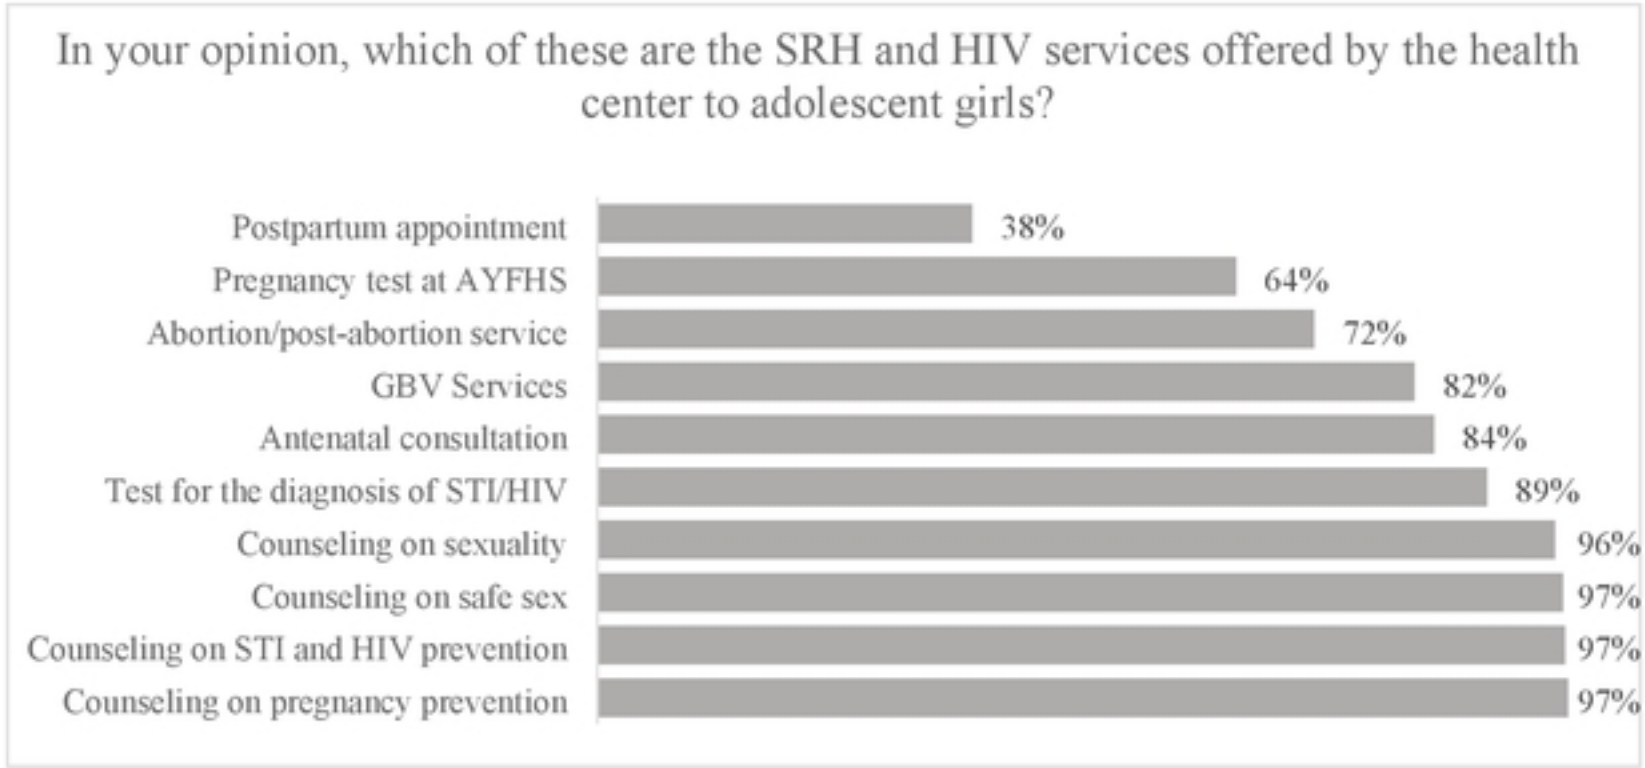

medRxiv preprint doi: <https://doi.org/10.1101/2024.09.14.24313688>; this version posted September 15, 2024. The copyright holder for this preprint (which was not certified by peer review) is the author/funder, who has granted medRxiv a license to display the preprint in perpetuity.

It is made available under a [CC-BY 4.0 International license](https://creativecommons.org/licenses/by/4.0/).

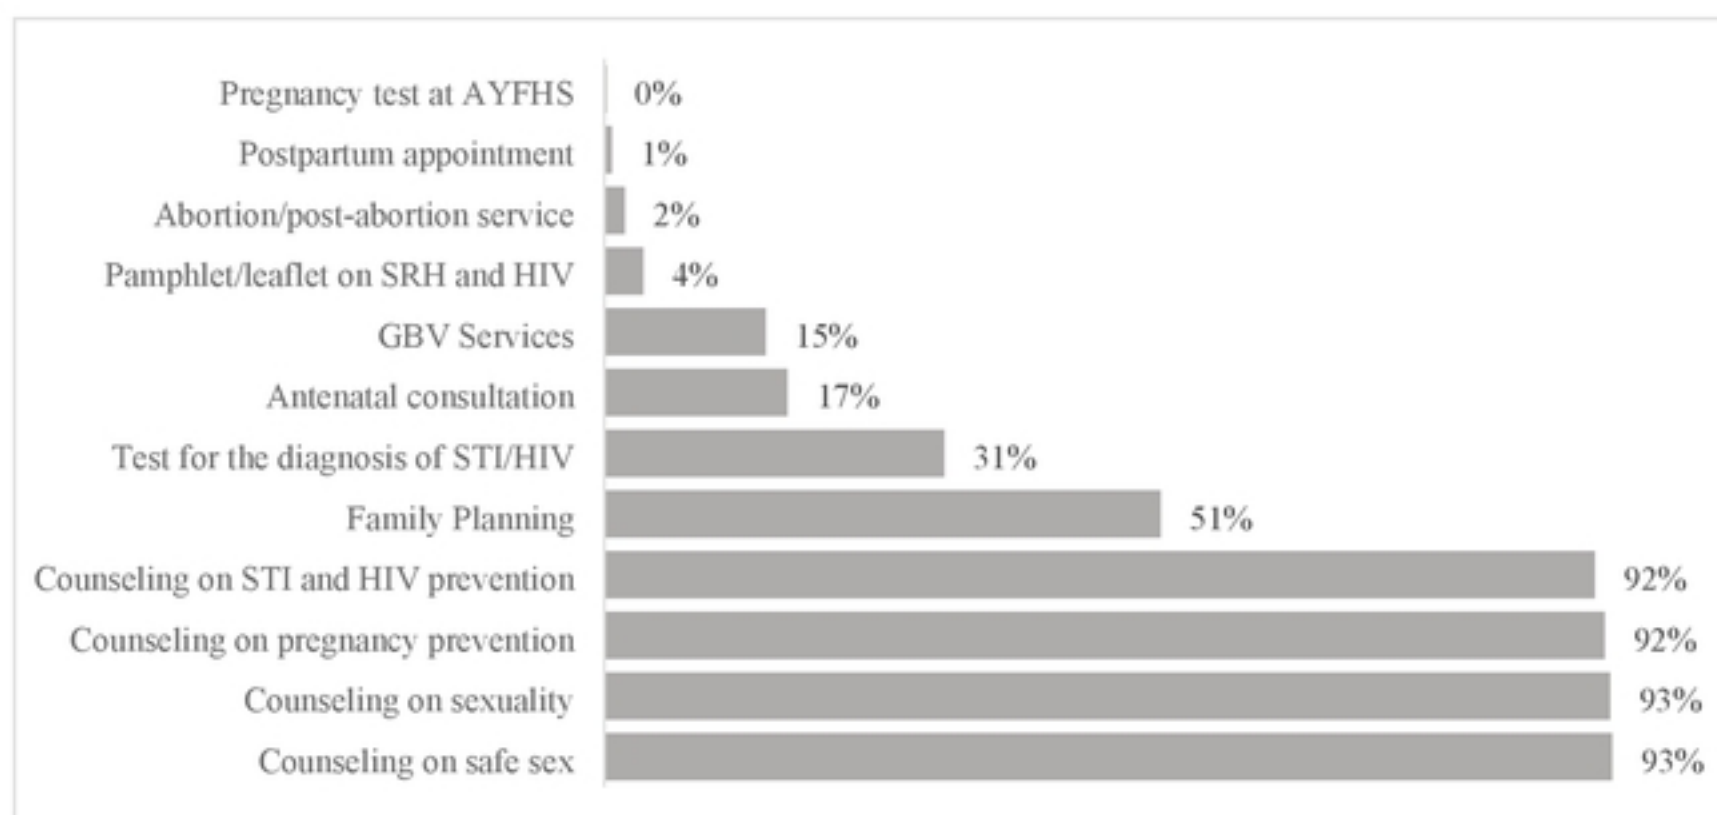

medRxiv preprint doi: <https://doi.org/10.1101/2024.09.14.24313688>; this version posted September 15, 2024. The copyright holder for this preprint (which was not certified by peer review) is the author/funder, who has granted medRxiv a license to display the preprint in perpetuity.

It is made available under a [CC-BY 4.0 International license](https://creativecommons.org/licenses/by/4.0/).
